# Supplementary material for: The Impact Of Dual Trigger Stimulation Upon Reproductive Outcomes In Woman Of Advanced Maternal Age – A Large Retrospective Study
Source: Research Square preprint supplement (doi:10.21203/rs.3.rs-6115929/v1), 2025-02-28
Supplement: Supplementary file 1 [file 4aaed22992d36e3b18a267a9.docx]

| Table 1. Comparison of baseline characteristics between women undergoing dual vs hCG trigger. | | | |
| --- | --- | --- | --- |
|  | Dual Trigger | hCG Trigger | p-value |
| Number of patients | 327 | 1124 |  |
| Number of cycles | 437 | 1762 |  |
| Age | 41.0 (40.0-42.0) | 41.0 (40.0-42.0) | 0.81 |
| BMI | 24.0 (21.4-28.2) | 24.0 (21.5-27.5) | 0.85 |
| Previous IVF attempts | 1 (0-3) | 1 (0-3) | 0.79 |
| AMH levels (ng/ml) | 1.1 (0.5-1.6) | 0.9 (0.6-1.7) | 0.69 |
| Treatment Indications: |  |  | 0.24 |
| male factor | 45 (10.3) | 242 (13.7) |  |
| Tubal | 15 (3.4) | 77 (4.4) |  |
| Anovulatory | 2 (0.5) | 12 (0.7) |  |
| Endometriosis | 7 (1.6) | 31 (1.8) |  |
| ovarian insufficiency | 174 (39.8) | 637 (36.2) |  |
| Unexplained | 41 (9.4) | 205 (11.6) |  |
| lesbian/single | 53 (12.1) | 216 (12.3) |  |
| combined | 100 (22.9) | 342 (19.4) |  |

| Table 2. Comparison of primary and secondary outcomes between women undergoing dual vs hCG trigger according to the number of cycles. | | | |
| --- | --- | --- | --- |
|  | *Dual Trigger* | *hCG Trigger* | *p-value* |
| Total Gonadotropin Dosage | 2250 (1990-2700) | 2140 (1800-2700) | 0.28 |
| Stimulation days | 10 (9-11) | 10 (9-11) | < 0.001 |
| Cumulus-Oocyte Complex (COC) | 5 (3-9) | 5 (3-8) | 0.39 |
| Number of MII oocytes | 3.0 (1.0-5.0) | 3.0 (1.0-5.0) | 0.16 |
| Maturation rate | 85.7 (66.7 - 100) | 87.5 (70 – 100) | 0.24 |
| Fertilization Rate | 60.0 (40.0-80.0) | 60.0 (37.5-77.8) | 0.2 |
| Embryo transfer (yes/no)1 | 378 (86.5) | 1470 (83.4) | 0.13 |
| Number of Embryos Transferred2 | 1 (1-1) | 2 (1-2) | < 0.001 |
| Embryo Transfer on Day 5/6 | 129 (34.1) | 243 (16.5) | < 0.001 |
| Total number of frozen embryos | 0 (0-1) | 0 (0-1) | 0.68 |
| Miscarriage rate | 35 (43.2) | 197 (45.3) | 0.81 |
| Positive hCG rate | 81 (18.5) | 435 (24.7) | 0.007 |
| Clinical Pregnancy | 40 (9.2) | 205 (11.6) | 0.15 |
| Live birth | 39 (8.9) | 203 (11.5) | 0.22 |
| Cumulative Live Birth Rate (cLBR) | 39 (8.9) | 233 (13.2) | 0.009 |
| 1: Binary variable that denotes if at least one embryo was successfully transferred.  2: Discrete variable that denotes the number of embryos that were transferred. | | | |

| Table 3. Effect of dual trigger therapy and age on number of MII oocytes | | | |
| --- | --- | --- | --- |
|  | Rate Ratio | 95% CI lower | 95% CI upper |
| Dual trigger (Unadjusted) | 1.08 | 0.99 | 1.18 |
| Dual trigger (Adjusted) | 1.1 | 1.00 | 1.21 |
| Age | 0.97 | 0.94 | 1.01 |
| BMI | 1.00 | 0.99 | 1.01 |
| Total Gonadotropin Dosage | 1.00 | 0.98 | 1.02 |
| Stimulation days | 1.05 | 1.02 | 1.07 |
| AMH | 1.26 | 1.22 | 1.30 |
